# Supplementary material
Source: publisher figshare collection journal article supplement (https://springernature.figshare.com/ndownloader/files/16881068)
Supplement: Supplementary file [file 16881068]

# STRUCTURE ( $K = 6$ )

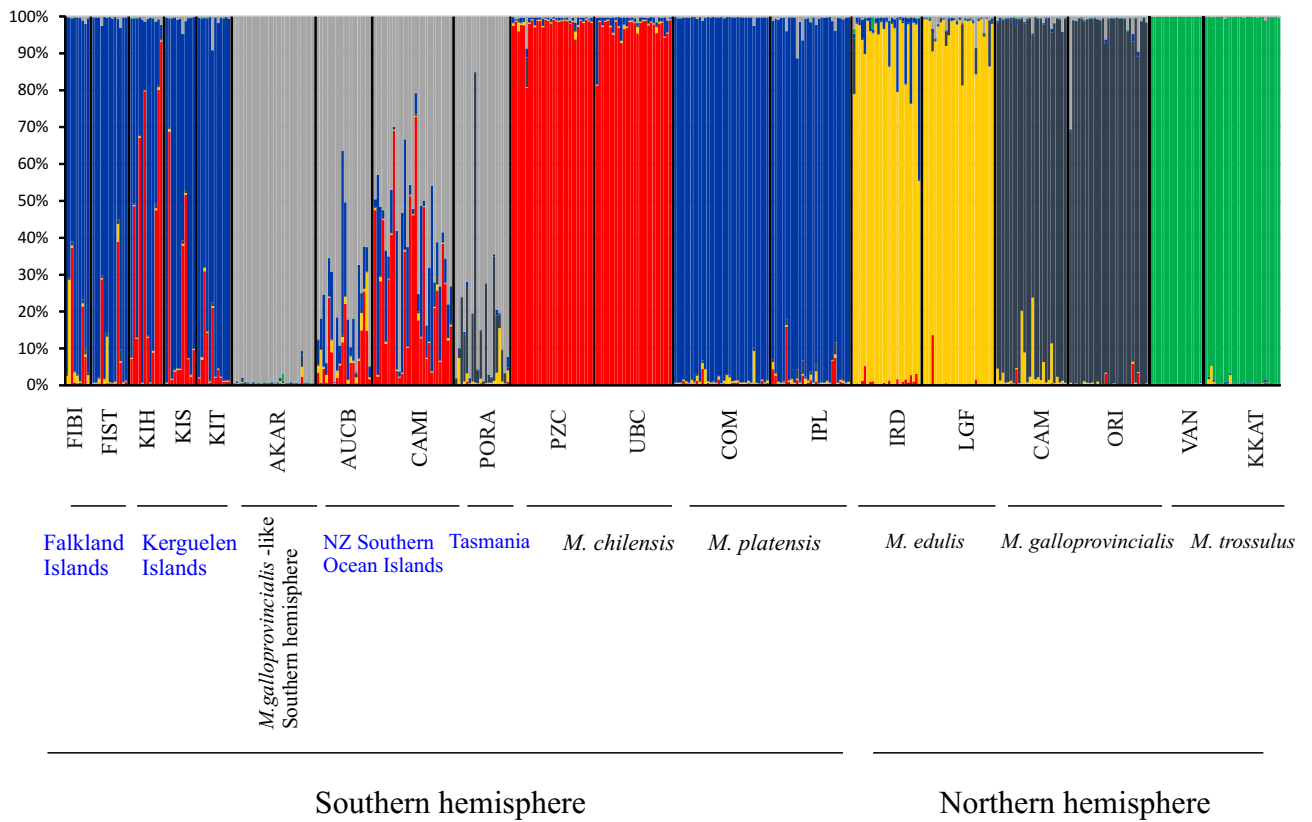

Figure S1. Structure plots for the 19 studied samples ( $K = 6$ ). Each individual is represented by a single vertical line broken into six coloured segments, with lengths proportional to each of the  $K$  inferred clusters. Abbreviation of the samples is provided in Table 1. Vertical black lines separate the populations.
